# Supplementary material for: A Comparative Proteomic Analysis of the Buds and the Young Expanding Leaves of the Tea Plant (Camellia sinensis L.)
Source: PubMed Central journal article supplement (PMC4490536; doi:10.3390/ijms160614007), 2015-06-18
Supplement: ijms-16-14007-s001.pdf [file ijms-16-14007-s001.pdf]

## Supplementary Information

**Table S1.** Gene ontology analysis.

| <b>Gene Ontology Term</b>  | <b>Cluster Frequency</b>   | <b>Protein Frequency of Use</b> | <b><i>p</i>-Value</b> |
|----------------------------|----------------------------|---------------------------------|-----------------------|
| Ribonucleoprotein complex  | 27 out of 162 genes, 16.7% | 135 out of 1663 genes, 8.1%     | 0.000118              |
| Endoplasmic reticulum      | 5 out of 162 genes, 3.1%   | 20 out of 1663 genes, 1.2%      | 0.038199              |
| Endoplasmic reticulum part | 5 out of 162 genes, 3.1%   | 20 out of 1663 genes, 1.2%      | 0.038199              |

**Table S2.** KEGG pathway analysis.

| <b>Pathway</b>                            | <b>Different Proteins with Pathway Annotation (165)</b> | <b>All Proteins with Pathway Annotation (1756)</b> | <b><i>p</i>-Value</b> | <b>Pathway ID</b> |
|-------------------------------------------|---------------------------------------------------------|----------------------------------------------------|-----------------------|-------------------|
| Ribosome                                  | 26 (15.76%)                                             | 98 (5.58%)                                         | $3.15 \times 10^{-7}$ | ko03010           |
| Sulfur metabolism                         | 3 (1.82%)                                               | 7 (0.4%)                                           | 0.02147144            | ko00920           |
| Phenylalanine metabolism                  | 6 (3.64%)                                               | 26 (1.48%)                                         | 0.02949184            | ko00360           |
| SNARE interactions in vesicular transport | 3 (1.82%)                                               | 9 (0.51%)                                          | 0.04477584            | ko04130           |
